# Supplementary material for: Syn-gas from waste: the reduction of CO2 with H2S
Source: Royal Society of Chemistry journal article supplement (doi:10.1039/c8re00334c), 2019-01-01
Supplement: c8re00334c1.pdf [file c8re00334c1.pdf]

## Formation of Syngas from Carbon Dioxide, Hydrogen Sulfide and Water

Virginie Peneau, Nicholas P. Alderman, Camilo Viasus, Ilia Korobkov, Balamurugan Vidjayacoumar, Khalid Bahily-Al and Sandro Gambarotta

### Production of Hydrogen

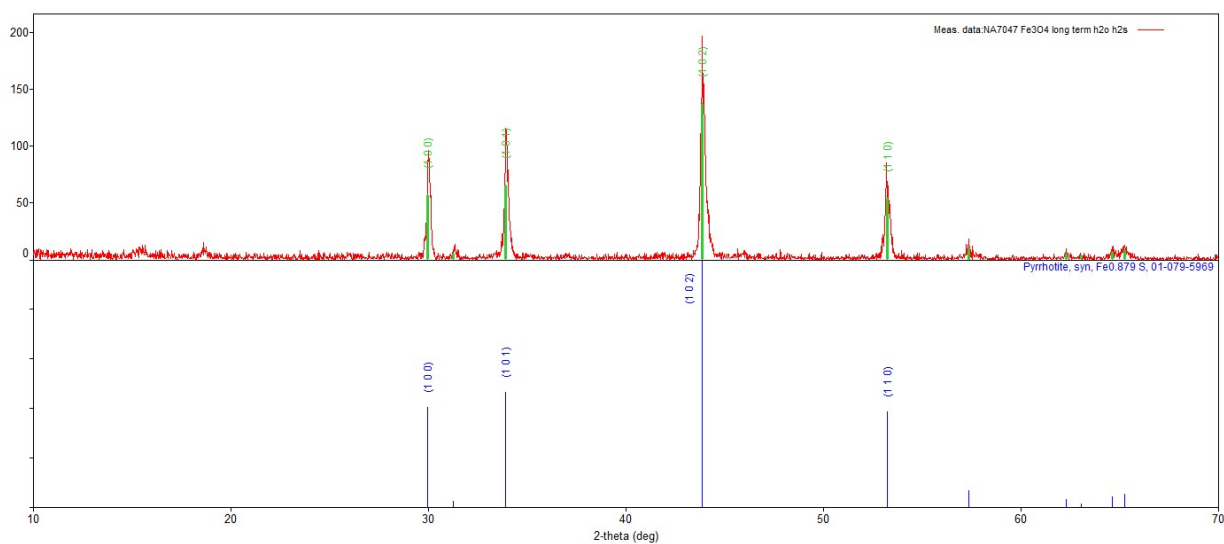

Supplementary Figure 1- XRD pattern of FeS + H<sub>2</sub>S + H<sub>2</sub>O after 7 hours reaction

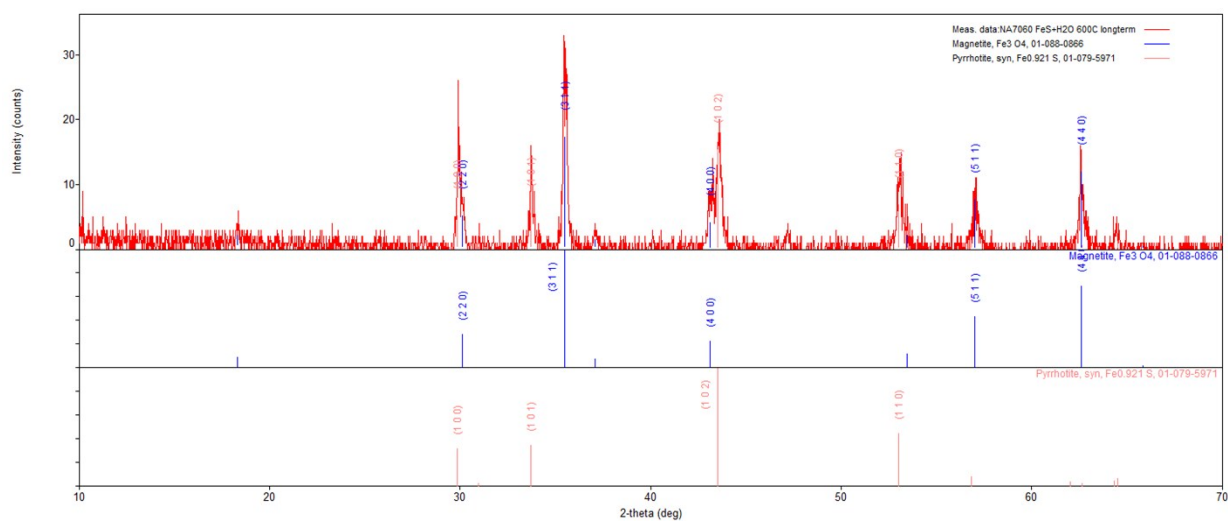

Supplementary Figure 2- XRD pattern of FeS + H<sub>2</sub>O after 5 hours reaction

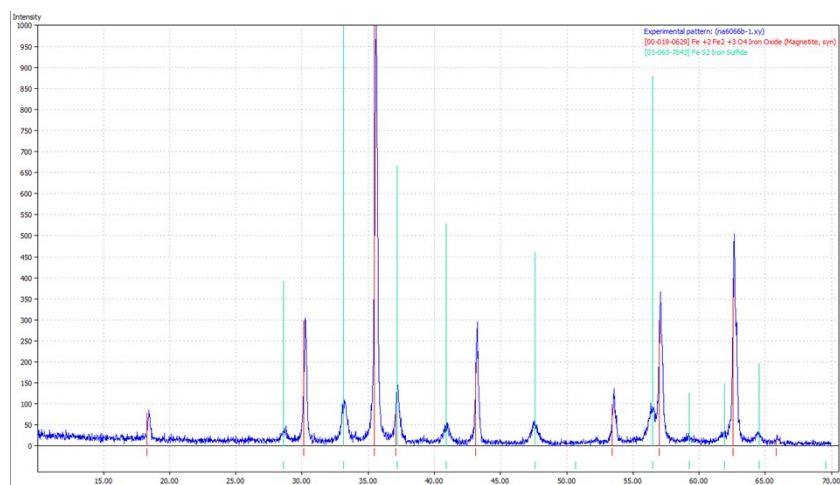

Supplementary Figure 3- XRD pattern of Fe<sub>3</sub>O<sub>4</sub> reacting with elemental sulfur at 400°C after an hour reaction.

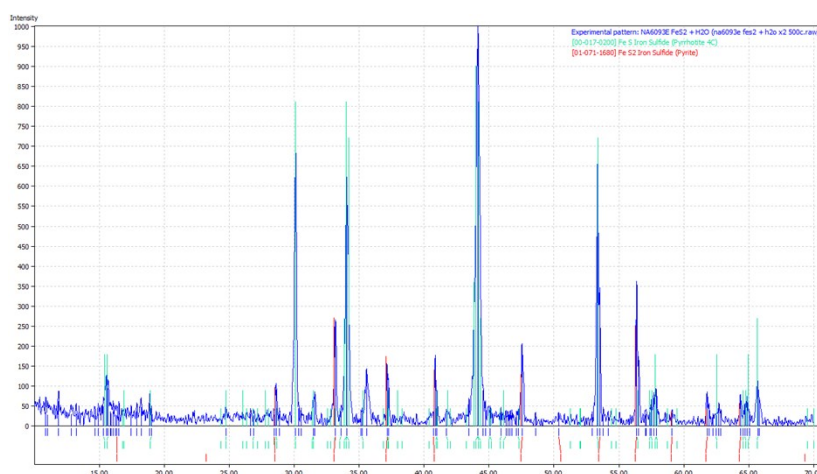

Supplementary Figure 4- XRD pattern of the reaction of FeS<sub>2</sub> with H<sub>2</sub>O at 500°C after 2 hours

Supplementary Table 1 - Hydrogen production rate from the reactions in figure 7

| FeS<br>(mmol) | S<br>(mmol) | SO <sub>2</sub><br>(mmol) |
|---------------|-------------|---------------------------|
| 2             | < 0.3       | 0.4                       |
| 5             | < 0.3       | 0.5                       |
| 7             | < 0.3       | 0.1                       |

Supplementary Table 2 - Hydrogen production rate from the reactions in figure 8

| <b>Flow<br/>(mL/H)</b> | <b>S<br/>(mmol)</b> | <b>SO<sub>2</sub><br/>(mmol)</b> | <b>H<sub>2</sub> rate<br/>(mmol/g<sub>catalyst</sub>/min)</b> |
|------------------------|---------------------|----------------------------------|---------------------------------------------------------------|
| 600                    | < 0.3               | 0.5                              | 0.0161                                                        |
| 1800                   | < 0.3               | 0.5                              | 0.0161                                                        |
| 3000                   | 0                   | 0.6                              | 0.0144                                                        |

Supplementary Table 3 - Hydrogen production rate from the reactions in figure 11

| <b>H<sub>2</sub>O Temp<br/>(°C)</b> | <b>S<br/>(mmol)</b> | <b>SO<sub>2</sub><br/>(mmol)</b> | <b>H<sub>2</sub> rate<br/>(mmol/g<sub>catalyst</sub>/min)</b> |
|-------------------------------------|---------------------|----------------------------------|---------------------------------------------------------------|
| Room<br>temperature                 | < 0.3               | 0.09                             | 0.0092                                                        |
| 60                                  | < 0.3               | 0.03                             | 0.0167                                                        |
| 85                                  | < 0.3               | 0.5                              | 0.0161                                                        |
| 100                                 | < 0.3               | 0.16                             | 0.0188                                                        |

Supplementary Table 4 - Hydrogen production rate from the reactions in figure 12

| <b>Temp<br/>(°C)</b> | <b>S<br/>(mmol)</b> | <b>SO<sub>2</sub><br/>(mmol)</b> | <b>H<sub>2</sub> rate<br/>(mmol/g<sub>catalyst</sub>/min)</b> |
|----------------------|---------------------|----------------------------------|---------------------------------------------------------------|
| 600                  | < 0.3               | 0.5                              | 0.0161                                                        |
| 700                  | 0.64                | 0.1                              | 0.0251                                                        |
| 800                  | 0.91                | 0.2                              | 0.0307                                                        |
| 900                  | 1.28                | 0.2                              | 0.0513                                                        |

Experiments performed starting from Fe<sub>3</sub>O<sub>4</sub>. The catalyst loading and gas flow were investigated.

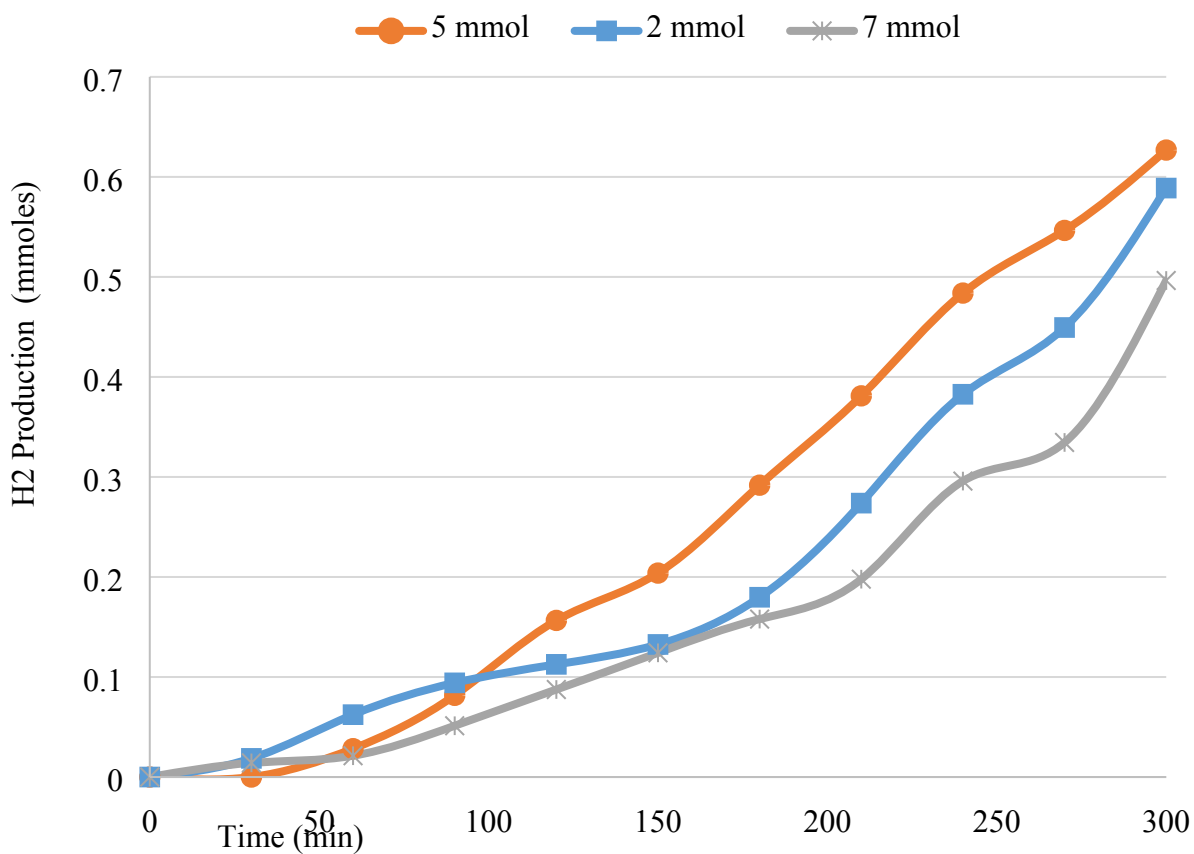

Supplementary Figure 5 - Hydrogen production from different iron oxide loadings in the tube furnace reaction

Supplementary Table 5 - Hydrogen production rate from the reactions in figure 9

| $\text{Fe}_3\text{O}_4$<br>(mmol) | S<br>(mmol) | $\text{SO}_2$<br>(mmol) | $\text{H}_2$ rate<br>(mmol/g <sub>catalyst</sub> /min) |
|-----------------------------------|-------------|-------------------------|--------------------------------------------------------|
| 2                                 | < 0.3       | 0.05                    | 0.0042                                                 |
| 5                                 | 0.8         | 0.2                     | 0.0018                                                 |
| 7                                 | < 0.3       | 0.07                    | 0.0010                                                 |

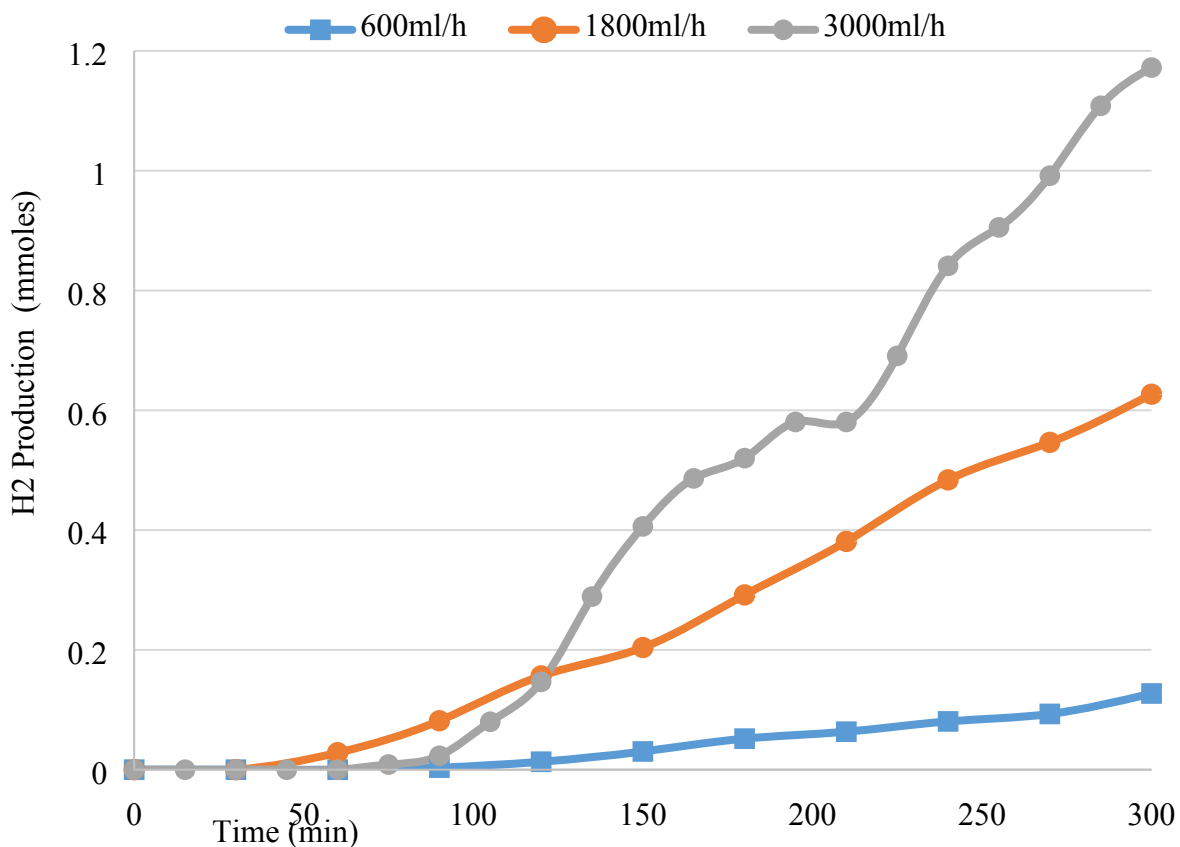

Supplementary Figure 6 - Hydrogen production from iron oxide in the tube furnace reaction using various gas flows

Supplementary Table 6 - Hydrogen production rate from the reactions in figure 10

| Flow<br>(mL/H) | S<br>(mmol) | SO <sub>2</sub><br>(mmol) | H <sub>2</sub> rate<br>(mmol/g <sub>catalyst</sub> /min) |
|----------------|-------------|---------------------------|----------------------------------------------------------|
| 600            | < 0.3       | 0.3                       | 0.0004                                                   |
| 1800           | 0.8         | 0.2                       | 0.0018                                                   |
| 3000           | < 0.3       | 0.4                       | 0.0034                                                   |

## FeS + CO<sub>2</sub>

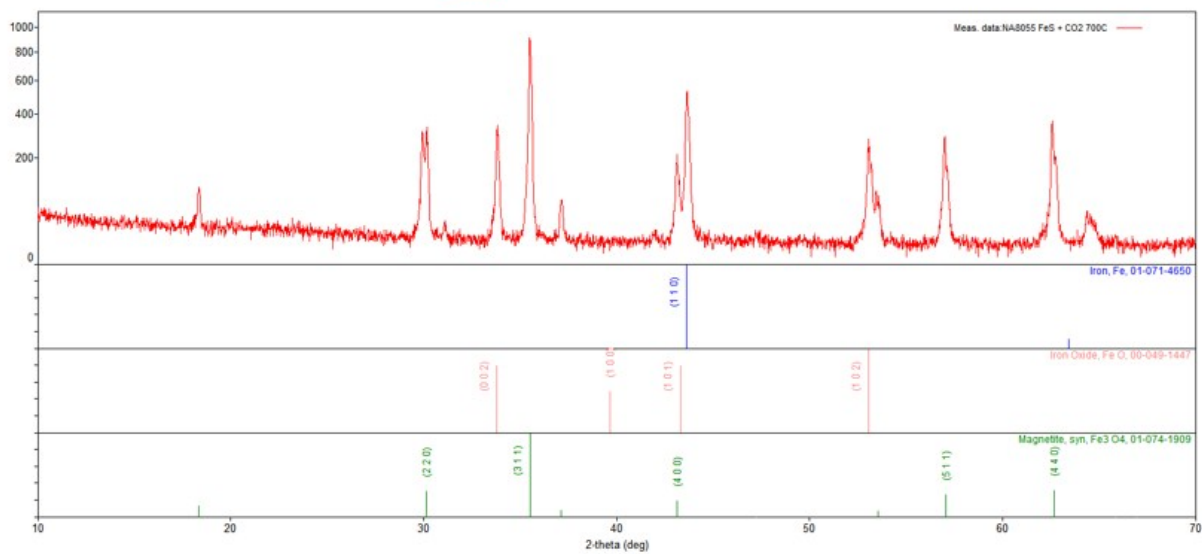

Supplementary Figure 7 – Products from the reaction FeS + CO<sub>2</sub> at 600°C for 5 hours

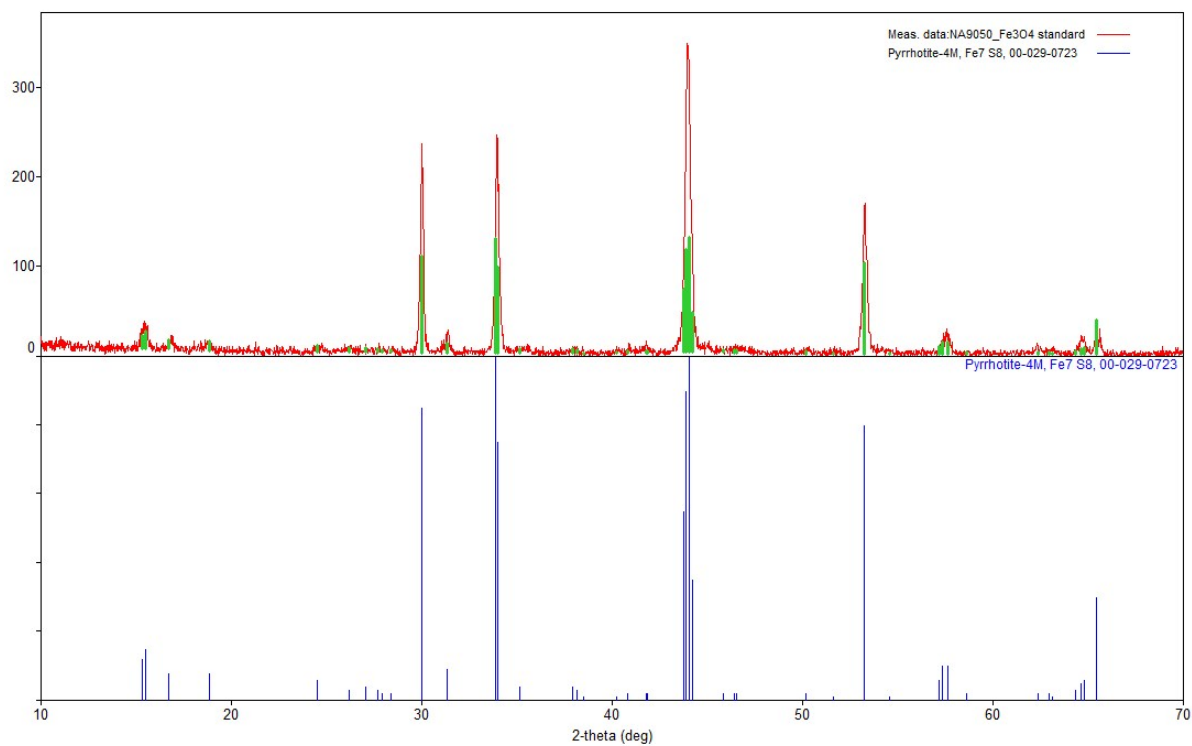

Supplementary Figure 8 – Products from the reaction Fe<sub>3</sub>O<sub>4</sub> + H<sub>2</sub>S at 600°C for 1 hour

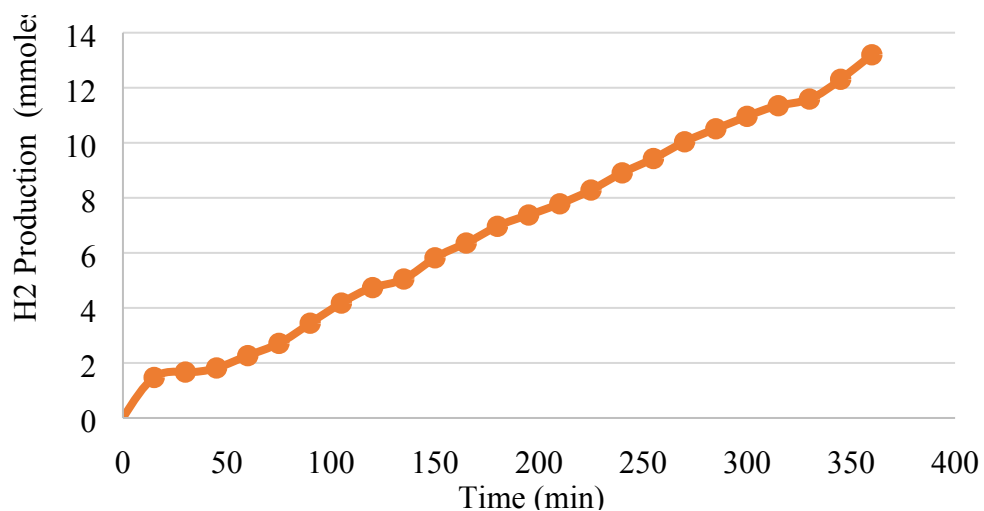

Supplementary Figure 9 – Production of Hydrogen from the best reaction conditions for FeS (5 mmoles of iron sulfide, 12% H<sub>2</sub>S in Ar with a total flow of 1800ml/H, Ar was flowing through an 85°C water and the reaction temperature was 900°C)

Supplementary Table 7 – Total amounts of reagents used and products formed from Figure 15 after 120 hours reaction

| Time | Total CO <sub>2</sub> injected (mmoles) | Total H <sub>2</sub> S injected (mmoles) | H <sub>2</sub> formation (mmoles) | CO formation (mmoles) | SO <sub>2</sub> formation (mmoles) | S formation (mmoles) |
|------|-----------------------------------------|------------------------------------------|-----------------------------------|-----------------------|------------------------------------|----------------------|
| 40   | 1071.4                                  | 107.1                                    | 49.2                              | 28.9                  | 0.3                                | 63.3                 |
| 80   | 2142.9                                  | 214.3                                    | 99.4                              | 40.2                  | 0.60                               | 125.4                |
| 120  | 3214.3                                  | 321.4                                    | 129.1                             | 50.6                  | 0.97                               | 145.1                |

Supplementary Table 8 – BET surface area analysis of all catalysts used

| Catalyst                         | Surface area (m <sup>2</sup> /g) |
|----------------------------------|----------------------------------|
| FeS (25 mesh)                    | 1.390                            |
| FeS (60 mesh)                    | 2.080                            |
| FeS (230 mesh)                   | 3.112                            |
| FeS (300 mesh)                   | 8.912                            |
| FeS (300 mesh, 1 hour reacting)  | 7.709                            |
| FeS (300 mesh, 3 hours reacting) | 5.287                            |
| FeS (300 mesh, 5 hours reacting) | 4.894                            |
| WS <sub>2</sub>                  | 7.113                            |

|                                |       |
|--------------------------------|-------|
| MoS <sub>2</sub>               | 9.883 |
| CoS                            | 9.135 |
| NbO <sub>2</sub>               | 7.686 |
| Mn <sub>3</sub> O <sub>4</sub> | 3.263 |
| PbS                            | 3.979 |
| CdS                            | 72.51 |
| V <sub>2</sub> O <sub>5</sub>  | 6.046 |
| RuO <sub>2</sub>               | 130.0 |
| NiS                            | 6.219 |
| IrO <sub>2</sub>               | 27.33 |

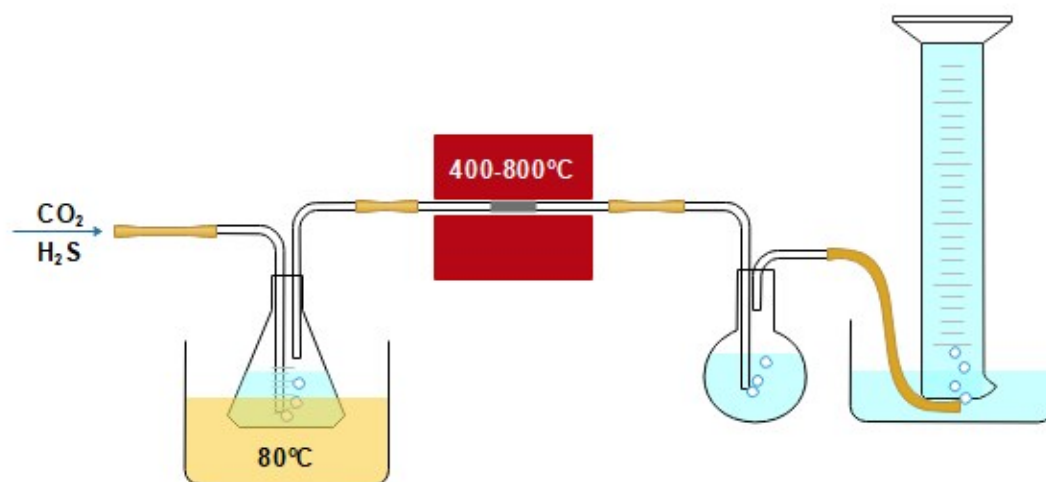

Supplementary Figure 10 – Experimental set-up

Supplementary Table 9 – The hydrogen production rates per surface area of FeS (300 mesh) for Figure 13

| Time (hrs) | Hydrogen production (mmoles/hr/m <sup>2</sup> ) |
|------------|-------------------------------------------------|
| 1          | 0.439                                           |
| 2          | 0.191                                           |
| 3          | 0.064                                           |
| 4          | 0.059                                           |
| 5          | 0.081                                           |
